# Supplementary material
Source: publisher figshare collection journal article supplement (https://gsapubs.figshare.com/ndownloader/files/22747751)
Supplement: Supplementary file 1 [file 22747751]

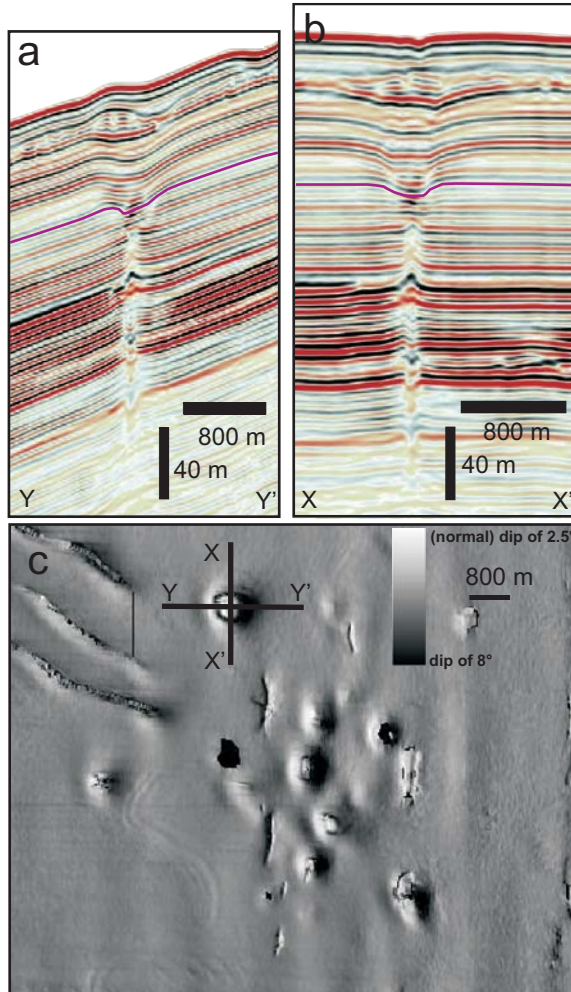

Fig DR1. Dip and strike seismic lines (a and b respectively) across erosional depressions interpreted as pockmarks showing venting to the seabed. c) Dip map showing cluster of 12 pockmarks

Table DR1

| Stratigraphic Traps                       |              |               |               |                   |               |              |                    |               |             |               |
|-------------------------------------------|--------------|---------------|---------------|-------------------|---------------|--------------|--------------------|---------------|-------------|---------------|
|                                           |              |               | Thickness (m) |                   |               |              |                    |               | GT Methane  |               |
| Amplitude Anomaly Name                    | Area (m2)    | Min Thickness | Most Likely   | Maximum Thickness | Volume (m3)   | Porosity (Φ) | Gas Saturation (%) | Min Gt Carbon | Most Likely | Max GT Carbon |
| 1                                         | 32951654.00  | 2.00          | 5.00          | 10.00             | 329516540.00  | 40%          | 12%                | 5.84043E-05   | 0.001752129 | 0.020441506   |
| 2                                         | 31219002.00  | 2.00          | 5.00          | 10.00             | 312190020.00  | 40%          | 12%                | 5.53333E-05   | 0.001659999 | 0.019366658   |
| 3                                         | 99762768.00  | 2.00          | 5.00          | 10.00             | 997627680.00  | 40%          | 12%                | 0.000176822   | 0.005304658 | 0.061887674   |
| 4                                         | 57194844.00  | 2.00          | 5.00          | 10.00             | 571948440.00  | 40%          | 12%                | 0.000101374   | 0.003041205 | 0.03548073    |
| 5                                         | 15464037.00  | 2.00          | 5.00          | 10.00             | 154640370.00  | 40%          | 12%                | 2.74088E-05   | 0.000522265 | 0.009593091   |
| 6                                         | 5076671.50   | 2.00          | 5.00          | 10.00             | 50766715.00   | 40%          | 12%                | 8.99801E-06   | 0.00026994  | 0.003149305   |
| 7                                         | 2712929.50   | 2.00          | 5.00          | 10.00             | 27129295.00   | 40%          | 12%                | 4.80846E-06   | 0.000144254 | 0.001682961   |
| 8                                         | 8759484.00   | 2.00          | 5.00          | 10.00             | 87594840.00   | 40%          | 12%                | 1.55255E-05   | 0.000465766 | 0.005433932   |
| 9                                         | 5358526.50   | 2.00          | 5.00          | 10.00             | 53585265.00   | 40%          | 12%                | 9.49758E-06   | 0.000284927 | 0.003324153   |
| 10                                        | 78185304.00  | 2.00          | 5.00          | 10.00             | 781853040.00  | 40%          | 12%                | 0.000138578   | 0.004157325 | 0.048502128   |
| 11                                        | 20362130.00  | 2.00          | 5.00          | 10.00             | 203621300.00  | 40%          | 12%                | 3.60903E-05   | 0.00108271  | 0.012631615   |
| 12                                        | 126098328.00 | 2.00          | 5.00          | 10.00             | 1260983280.00 | 40%          | 12%                | 0.0002235     | 0.006704991 | 0.078224896   |
| 13                                        | 6069167.50   | 2.00          | 5.00          | 10.00             | 60691675.00   | 40%          | 12%                | 1.07571E-05   | 0.000322714 | 0.003764998   |
| 14                                        | 1186517.50   | 2.00          | 5.00          | 10.00             | 11865175.00   | 40%          | 12%                | 2.10301E-06   | 6.30904E-05 | 0.000736054   |
| 15                                        | 757551.88    | 2.00          | 5.00          | 10.00             | 7575518.80    | 40%          | 12%                | 1.3427E-06    | 4.02811E-05 | 0.000469946   |
| 16                                        | 21641376.00  | 2.00          | 5.00          | 10.00             | 216413760.00  | 40%          | 12%                | 3.83577E-05   | 0.001150731 | 0.013425193   |
| 17                                        | 6302639.50   | 2.00          | 5.00          | 10.00             | 63026395.00   | 40%          | 12%                | 1.11709E-05   | 0.000335128 | 0.003909832   |
| 18                                        | 1015081.50   | 2.00          | 5.00          | 10.00             | 10150815.00   | 40%          | 12%                | 1.79915E-06   | 5.39746E-05 | 0.000629704   |
| 19                                        | 749442.56    | 2.00          | 5.00          | 10.00             | 7494425.63    | 40%          | 12%                | 1.32833E-06   | 3.98499E-05 | 0.000464915   |
| 20                                        | 8877822.00   | 2.00          | 5.00          | 10.00             | 88778220.00   | 40%          | 12%                | 1.57353E-05   | 0.000472058 | 0.005507343   |
| 21                                        | 1509588.50   | 2.00          | 5.00          | 10.00             | 15095885.00   | 40%          | 12%                | 2.67563E-06   | 8.02689E-05 | 0.000936471   |
| 22                                        | 2451968.00   | 2.00          | 5.00          | 10.00             | 24519680.00   | 40%          | 12%                | 4.34593E-06   | 0.000130378 | 0.001521074   |
| 23                                        | 6405889.00   | 2.00          | 5.00          | 10.00             | 64058890.00   | 40%          | 12%                | 1.1354E-05    | 0.000340619 | 0.003973883   |
| 24                                        | 86409280.00  | 2.00          | 5.00          | 10.00             | 864092800.00  | 40%          | 12%                | 0.000153154   | 0.004594616 | 0.053603859   |
| 25                                        | 21851336.00  | 2.00          | 5.00          | 10.00             | 218513360.00  | 40%          | 12%                | 3.87298E-05   | 0.001161895 | 0.013555441   |
| 26                                        | 42289396.00  | 2.00          | 5.00          | 10.00             | 422893960.00  | 40%          | 12%                | 7.49547E-05   | 0.002248642 | 0.026234159   |
| 27                                        | 69743694.00  | 2.00          | 5.00          | 10.00             | 697436940.00  | 40%          | 12%                | 0.000123615   | 0.003708462 | 0.043265389   |
| 28                                        | 5408529.50   | 2.00          | 5.00          | 10.00             | 54085295.00   | 40%          | 12%                | 9.58621E-06   | 0.000287586 | 0.003355173   |
| 29                                        | 9050464.13   | 2.00          | 5.00          | 10.00             | 90504641.25   | 40%          | 12%                | 1.60413E-05   | 0.000481238 | 0.005614441   |
| 30                                        | 1615522.38   | 2.00          | 5.00          | 10.00             | 16155223.75   | 40%          | 12%                | 2.86339E-06   | 8.59017E-05 | 0.001002187   |
| 31                                        | 15987489.00  | 2.00          | 5.00          | 10.00             | 159874890.00  | 40%          | 12%                | 2.83366E-05   | 0.000850098 | 0.009917813   |
| 32                                        | 40037016.00  | 2.00          | 5.00          | 10.00             | 400370160.00  | 40%          | 12%                | 7.09626E-05   | 0.002128877 | 0.024836899   |
| 33                                        | 14781602.00  | 2.00          | 5.00          | 10.00             | 147816020.00  | 40%          | 12%                | 2.61993E-05   | 0.000785978 | 0.009169743   |
| 34                                        | 11983642.00  | 2.00          | 5.00          | 10.00             | 119836420.00  | 40%          | 12%                | 2.12401E-05   | 0.000637203 | 0.007434033   |
| 35                                        | 65160092.00  | 2.00          | 5.00          | 10.00             | 651600920.00  | 40%          | 12%                | 0.000115491   | 0.003464739 | 0.040421959   |
| 36                                        | 12999455.00  | 2.00          | 5.00          | 10.00             | 129994550.00  | 40%          | 12%                | 2.30405E-05   | 0.000691216 | 0.008064191   |
| 37                                        | 14935866.00  | 2.00          | 5.00          | 10.00             | 149358660.00  | 40%          | 12%                | 2.64727E-05   | 0.000794181 | 0.009265441   |
| 38                                        | 4407251.50   | 2.00          | 5.00          | 10.00             | 44072515.00   | 40%          | 12%                | 7.81152E-06   | 0.000234346 | 0.002734031   |
| 39                                        | 1885327.25   | 2.00          | 5.00          | 10.00             | 18853272.50   | 40%          | 12%                | 3.3416E-06    | 0.000100248 | 0.00116956    |
| 40                                        | 27906996.00  | 2.00          | 5.00          | 10.00             | 279069960.00  | 40%          | 12%                | 4.9463E-05    | 0.001483891 | 0.01731206    |
| 41                                        | 36258808.00  | 2.00          | 5.00          | 10.00             | 362588080.00  | 40%          | 12%                | 6.4266E-05    | 0.001927979 | 0.022493094   |
| 42                                        | 12109308.00  | 2.00          | 5.00          | 10.00             | 121093080.00  | 40%          | 12%                | 2.14628E-05   | 0.000643885 | 0.00751199    |
| 43                                        | 52129700.00  | 2.00          | 5.00          | 10.00             | 521297000.00  | 40%          | 12%                | 9.23959E-05   | 0.002771878 | 0.032338576   |
| 44                                        | 24157786.00  | 2.00          | 5.00          | 10.00             | 241577860.00  | 40%          | 12%                | 4.28178E-05   | 0.001284535 | 0.014986244   |
| 45                                        | 42855052.00  | 2.00          | 5.00          | 10.00             | 428550520.00  | 40%          | 12%                | 7.59573E-05   | 0.00227872  | 0.028595063   |
| 46                                        | 11346379.00  | 2.00          | 5.00          | 10.00             | 113463790.00  | 40%          | 12%                | 2.01106E-05   | 0.000603318 | 0.007038708   |
| 47                                        | 8579450.00   | 2.00          | 5.00          | 10.00             | 85794500.00   | 40%          | 12%                | 1.52064E-05   | 0.000456193 | 0.005322248   |
| 48                                        | 1857301.88   | 2.00          | 5.00          | 10.00             | 18573018.75   | 40%          | 12%                | 3.29193E-06   | 9.87578E-05 | 0.001152174   |
| 49                                        | 22420638.00  | 2.00          | 5.00          | 10.00             | 224206380.00  | 40%          | 12%                | 3.97389E-05   | 0.001192166 | 0.013908607   |
| 50                                        | 16033856.00  | 2.00          | 5.00          | 10.00             | 160338560.00  | 40%          | 12%                | 2.84188E-05   | 0.000852564 | 0.009946577   |
| 51                                        | 28053974.00  | 2.00          | 5.00          | 10.00             | 280539740.00  | 40%          | 12%                | 4.97235E-05   | 0.001491706 | 0.017403238   |
| 52                                        | 12586933.00  | 2.00          | 5.00          | 10.00             | 125869330.00  | 40%          | 12%                | 2.23094E-05   | 0.000669281 | 0.007808284   |
| 53                                        | 10771273.00  | 2.00          | 5.00          | 10.00             | 107712730.00  | 40%          | 12%                | 1.90913E-05   | 0.000572738 | 0.006681942   |
| 54                                        | 269225344.00 | 2.00          | 5.00          | 10.00             | 2692253440.00 | 40%          | 12%                | 0.000477181   | 0.014315444 | 0.167013511   |
|                                           |              |               |               |                   |               |              | Totals in Gt       | 0.002720585   | 0.0816175   | 0.952204697   |
| Free Gas Accumulations Trapped By Hydrate |              |               |               |                   |               |              |                    |               |             |               |
| Amplitude Anomaly Name                    | Area (m2)    | Min Thickness | Thickness (m) | Maximum Thickness | Volume (m3)   | Porosity (Φ) | Gas Saturation (%) | Minimum       | GT Methane  | Maximum       |
| 1                                         | 68584896.00  | 2.00          | 5.00          | 10.00             | 342824480.00  | 40%          | 12%                | 0.000121526   | 0.003645782 | 0.212670618   |
| 2                                         | 7321637      | 2.00          | 5.00          | 10.00             | 36608185.00   | 40%          | 12%                | 1.2977E-05    | 0.000389311 | 0.022709829   |
|                                           |              |               |               |                   |               |              | Totals in Gt       | 0.000134503   | 0.0040351   | 0.235380447   |
